# Supplementary material
Source: MDPI journal article supplement (https://www.mdpi.com/2073-4441/15/22/3963)
Supplement: s1 [file s1]

# Optimization of Critical Factors Affecting Dynamic Membrane Formation in a Gravity-Driven Self-Forming Dynamic Membrane Bioreactor towards Low-Cost and Low-Maintenance Wastewater Treatment

Luhe Tang <sup>1</sup>, Jingyu Zhang <sup>1</sup>, Lulu Zha <sup>2,3</sup>, Yisong Hu <sup>2,3,\*</sup>, Yiming Yang <sup>1</sup>, Yunsheng Zhao <sup>1</sup>, Xinglong Dong <sup>1</sup>, Zhanjiu Wang <sup>1</sup>, Weihang Deng <sup>2,3</sup> and Yuan Yang <sup>2,3</sup>

<sup>1</sup> Beijing Huayu Brilliant Eco-Environmental Protection Technology Co., Ltd., Beijing 102412, China; tang\_1680@126.com (L.T.); zhangjingyu@huayuhuihuang.cn (J.Z.); 15811321317@126.com (Y.Y.); shang\_lisi@163.com (Y.Z.); dongxinglong163@163.com (X.D.); wzjayh9@163.com (Z.W.)

<sup>2</sup> Shanxi Key Laboratory of Environmental Engineering, Xi'an University of Architecture and Technology, Xi'an 710055, China; cli01070204@163.com (L.Z.); yuanyang@xauat.edu.cn (Y.Y.)

<sup>3</sup> Key Lab of Northwest Water Resource, Environment and Ecology, MOE, Xi'an University of Architecture and Technology, Xi'an 710055, China

\* Correspondence: huyisong@xauat.edu.cn; Tel.: +86-029-8220-5652

Number of tables: 2

Table S1 A nomenclature list

| acronyms                        | full names                               |
|---------------------------------|------------------------------------------|
| SFDMBR                          | self-forming dynamic membrane bioreactor |
| SFDM                            | self-forming dynamic membrane            |
| COD                             | chemical oxygen demand                   |
| SCOD                            | soluble chemical oxygen demand           |
| NH <sub>4</sub> <sup>+</sup> -N | ammonia nitrogen                         |
| MBR                             | Membrane bioreactors                     |
| HRT                             | hydraulic retention time                 |
| SRT                             | sludge retention time                    |
| DM                              | dynamic membrane                         |
| PCDM                            | precoated dynamic membrane               |
| WWTP                            | wastewater treatment plant               |
| TN                              | total nitrogen                           |
| TP                              | total phosphorus                         |
| AAO-MBR                         | anaerobic-anoxic-oxic-MBR                |
| MLSS                            | mixed liquor suspended solids            |
| DO                              | dissolved oxygen                         |
| CVM                             | control variable method                  |
| MLVSS                           | mixed liquor volatile suspended solids   |
| R <sub>t</sub>                  | total filtration resistance              |
| R <sub>m</sub>                  | intrinsic resistance                     |
| R <sub>c</sub>                  | cake layer resistance                    |
| R <sub>p</sub>                  | pore blocking resistance                 |
| SEM                             | scanning electron microscope             |
| EDX                             | energy-dispersive X-ray analyzer         |
| LMH                             | L/m <sup>2</sup> h                       |

## Results and discussion

### 3.5.2 Pollutants removal performance

Table S2 Operational Performance Comparison of SFDMBRs

| operating condition             |            |                   | Wastewater type      | Filtration performance |                          |                           | Pollutant removal performance |                                 | Reference           |
|---------------------------------|------------|-------------------|----------------------|------------------------|--------------------------|---------------------------|-------------------------------|---------------------------------|---------------------|
| Supporting material             | MLSS (g/L) | Gravity head (cm) |                      | Stable flux (LMH)      | Effluent turbidity (NTU) | SFDM formation time (min) | COD                           | NH <sub>4</sub> <sup>+</sup> -N |                     |
| 48 µm stainless steel mesh      | 5-6        | 15                | Real domestic sewage | 30-50                  | 1                        | < 5                       | 93.3%                         | 95.5%                           | This study          |
| 100 µm dacron mesh              | 3.5        | < 5               | Municipal wastewater | -                      | -                        | -                         | 84.2%                         | 98.0%                           | Fan and Huang [11]  |
| 30 µm Woven polyester filaments | 8-9        | -                 | Real domestic sewage |                        | 5                        | 30                        | 90-95%                        | 95-99%                          | Loderer et al. [14] |
| industrial filter-cloth         | 6          |                   | Municipal wastewater | 17-21                  | 9                        | -                         | 80%                           | 74%                             | Chu et al. [20]     |
| 25 µm nylon mesh                | 3-5        | 5                 | Synthetic wastewater | 66.4                   | 2                        | -                         | 20 mg/L                       |                                 | Cai et al. [26]     |
| 80 µm nylon mesh                | 3.89       | 25                | Municipal wastewater | -                      | 2                        | -                         | 83.3%                         | 98.1%                           | Wang et al. [35]    |
| 75 µm nylon mes                 | -          | 20                | Real domestic sewage | 4.2-16                 | 1                        | 5                         | 88%                           | 98.2%                           | Yang et al. [36]    |
